# Supplementary material for: A novel TALE nuclease scaffold enables high genome editing activity in combination with low toxicity
Source: PubMed Central journal article supplement — Nucleic Acids Res. 2011 Aug 3;39(21):9283–93. doi: 10.1093/nar/gkr597 (PMC3241638; doi:10.1093/nar/gkr597), 2011-08-03
Supplement: supp_gkr597_gkr597_Supporting_Information.pdf [file supp_gkr597_gkr597_Supporting_Information.pdf]

## Supplementary Figure S1

## (a) Annotated AvrBs4 protein sequence

N-Terminal:

<sup>+287</sup>  
 MDP<sup>▲</sup>PIRSRT<sup>▲</sup>PSPARELLPGPQPDGVQPTADRGVSPAGGPLDGLPARRTMSRTRLPSPAPSPAFSAGSFSD  
<sup>▲</sup><sub>Δ1</sub>  
 LLRQFDPSLFNTSLFDSLPPFGAHHTEAATGEWDEVQSGLRAADAPPPTMRVAVTAARPPRAKPAPRRRAA<sup>+153</sup>  
<sup>▲</sup><sub>Δ135</sub>  
 QPSDASPAAQVDLRTLGY<sup>▲</sup>SQQQEQEKIKPKVRS<sup>+49</sup>TVAQHHEALVGHGFTHAHIVALSQHPAALGTVAVKYQDM  
<sup>▲</sup><sub>Δ239</sub>  
 IAALPEATHEAIVGVGKQWSGARALEALLTVAGELRGPPLQLDTGQLLKI<sup>▲</sup>AKRGGVTAVEAVHAWRNALTG  
 APLN

Aligned repeat domains:

LTPEQVVAIAS**NI**GGKQALETVQALLPVLCQAHG  
 LTPDQVVAIAS**NG**GGKQALETVQRLLPVLCQAHG  
 LTPEQVVAIAS**NI**GGKQALETVQRLLPVLCQAHG  
 LTPEQVVAIAS**NI**GGKQALETVQRLLPVLCQAHG  
 LTPEQVVAIAS**NG**GGKQALETVQRLLPVLCQAHG  
 LTPQQVVAIAS**NG**GGKQALETVQRLLPVLCQAHG  
 LIPQQVVAIAS**NI**GGKQALETVQRLLPVLCQDHG  
 LTPQQVVAIAS**NS**GGKQALETVQRLLPVLCQAHG  
 LTPEQVVAIAS**NG**GGKQALETVQRLLPVLCQAHG  
 LTPQQVVAIAS**NI**GGKQALETVQRLLPVLCQDHG  
 LTPQQVVAIAS**NS**GGKQALETVQRLLPVLCQAHG  
 LTPQQVVAIAS**NG**GGKQALETVQRLLPVLCQAHG  
 LTPQQVVAIAS**HD**GGKQALETVQRLLPVLCQAHG  
 LTPQQVVAIAS**HD**GGKQALETVQRLLPVLCQAHG  
 LTPQQVVAIAS**NS**GGKQALETVQRLLPVLCQAHG  
 LTPQQVVAIAS**HD**GGKQALETVQRLLPVLCQAHG  
 LTPQQVVAIAS**NG**GGKQALETVQRLLPVLCQAHG  
 LTPQQVVAIAS**NG**GRPAALE

C-Terminal:

<sup>+17</sup>  
 SIVAQLSRPDPALAA<sup>▲</sup>L<sup>▲</sup>TNDHLVALACLGGRPALDAVKKGLPHAPALIK<sup>+47</sup>RTNRRIPERTSHRVADHAQVVRV  
<sup>▲</sup><sub>Δ261</sub><sup>▲</sup><sub>Δ231</sub>  
 LGFFQCHSHPAQAFDDAMTQFGMSRHGLLQ<sup>▲</sup>LFRRVG<sup>▲</sup>VTELEARS<sup>▲</sup>GTLP<sup>▲</sup>PASQRWDRI<sup>▲</sup>LQASGMKRAKPSPT  
 STQTPDQASLHAFADSLERDLDAPSPMHEGDQTRASSRKR<sup>▲</sup>SRSDRAVTG<sup>▲</sup>PSAQQSFEV<sup>▲</sup>RVPEQRDALHLPL  
<sup>+231</sup>  
 SWRVKRPRTSIGGG<sup>▲</sup>LPDPGTPTAADLAASSTVMRE<sup>▲</sup>QDEDPFAGAADDFPAFNEEE<sup>▲</sup>LAWLME<sup>▲</sup>LLPQ  
<sup>▲</sup><sub>Δ47</sub>

(b) AvrBs3 protein sequence (aligned repeat domains only)

LTPEQVVVAIAS**HD**GGKQALETVQRLLPVLCQAHG  
LTPQQVVVAIAS**NG**GGKQALETVQRLLPVLCQAHG  
LTPQQVVVAIAS**NS**GGKQALETVQRLLPVLCQAHG  
LTPEQVVVAIAS**NG**GGKQALETVQRLLPVLCQAHG  
LTPEQVVVAIAS**NI**GGKQALETVQALLPVLCQAHG  
LTPEQVVVAIAS**NI**GGKQALETVQALLPVLCQAHG  
LTPEQVVVAIAS**NI**GGKQALETVQALLPVLCQAHG  
LTPEQVVVAIAS**HD**GGKQALETVQRLLPVLCQAHG  
LTPEQVVVAIAS**HD**GGKQALETVQRLLPVLCQAHG  
LTPQQVVVAIAS**NG**GGKQALETVQRLLPVLCQAHG  
LTPEQVVVAIAS**NS**GGKQALETVQALLPVLCQAHG  
LTPEQVVVAIAS**NS**GGKQALETVQRLLPVLCQAHG  
LTPEQVVVAIAS**NS**GGKQALETVQRLLPVLCQAHG  
LTPEQVVVAIAS**HD**GGKQALETVQRLLPVLCQAHG  
LTPEQVVVAIAS**HD**GGKQALETVQRLLPVLCQAHG  
LTPEQVVVAIAS**HD**GGKQALETVQRLLPVLCQAHG  
LTPQQVVVAIAS**NG**GGRPALETVQRLLPVLCQAHG  
LTPEQVVVAIAS**HD**GGKQALETVQRLLPVLCQAHG  
LTPQQVVVAIAS**NG**GGRPALE

(c) CCR5-specific TALEN, left subunit (repeat domains only)

LTPQQVVVAIAS**NN**GGKQALETVQRLLPVLCQAHG  
LTPQQVVVAIAS**NG**GGKQALETVQRLLPVLCQAHG  
LTPEQVVVAIAS**NN**GGKQALETVQRLLPVLCQAHG  
LTPEQVVVAIAS**NN**GGKQALETVQRLLPVLCQAHG  
LTPQQVVVAIAS**NN**GGKQALETVQRLLPVLCQAHG  
LTPEQVVVAIAS**HD**GGKQALETVQRLLPVLCQAHG  
LTPQQVVVAIAS**NI**GGKQALETVQALLPVLCQAHG  
LTPEQVVVAIAS**NI**GGKQALETVQALLPVLCQAHG  
LTPEQVVVAIAS**HD**GGKQALETVQRLLPVLCQAHG  
LTPQQVVVAIAS**NI**GGKQALETVQRLLPVLCQAHG  
LTPQQVVVAIAS**NG**GGKQALETVQRLLPVLCQAHG  
LTPEQVVVAIAS**NN**GGKQALETVQRLLPVLCQAHG  
LTPEQVVVAIAS**HD**GGKQALETVQRLLPVLCQAHG  
LTPEQVVVAIAS**NG**GGKQALETVQRLLPVLCQAHG  
LTPQQVVVAIAS**NN**GGKQALETVQRLLPVLCQAHG  
LTPEQVVVAIAS**NN**GGKQALETVQRLLPVLCQAHG  
LTPQQVVVAIAS**NG**GGKQALETVQALLPVLCQAHG  
LTPQQVVVAIAS**HD**GGRPALE

(d) CCR5-specific TALEN, right subunit (repeat domains only)

LTPQQVVVAIAS**HD**GGKQALETVQRLLPVLCQAHG  
LTPQQVVVAIAS**NG**GGKQALETVQRLLPVLCQAHG  
LTPEQVVVAIAS**NG**GGKQALETVQRLLPVLCQAHG  
LTPEQVVVAIAS**HD**GGKQALETVQRLLPVLCQAHG  
LTPEQVVVAIAS**NI**GGKQALETVQRLLPVLCQAHG  
LTPEQVVVAIAS**NN**GGKQALETVQRLLPVLCQAHG  
LTPQQVVVAIAS**HD**GGKQALETVQALLPVLCQAHG  
LTPEQVVVAIAS**HD**GGKQALETVQALLPVLCQAHG  
LTPEQVVVAIAS**NG**GGKQALETVQRLLPVLCQAHG

LTPQQVVAIAS**NGGGKQ**ALETVQRLLPVLCQAHG  
 LTPQQVVAIAS**NGGGKQ**ALETVQRLLPVLCQAHG  
 LTPQQVVAIAS**NGGGKQ**ALETVQRLLPVLCQAHG  
 LTPEQVVAIAS**NNGGKQ**ALETVQRLLPVLCQAHG  
 LTPEQVVAIAS**HDGGKQ**ALETVQRLLPVLCQAHG  
 LTPEQVVAIAS**NI**GGKQALETVQRLLPVLCQAHG  
 LTPEQVVAIAS**NNGGKQ**ALETVQRLLPVLCQAHG  
 LTPQQVVAIAS**NGGGKQ**ALETVQALLPVLCQAHG  
 LTPQQVVAIAS**NGGGRPALE**

(e) *IL2RG*-specific TALEN, left subunit (repeat domains only)

LTPQQVVAIAS**NI**GGKQALETVQRLLPVLCQAHG  
 LTPEQVVAIAS**HDGGKQ**ALETVQRLLPVLCQAHG  
 LTPEQVVAIAS**NI**GGKQALETVQRLLPVLCQAHG  
 LTPEQVVAIAS**HDGGKQ**ALETVQRLLPVLCQAHG  
 LTPQQVVAIAS**NNGGKQ**ALETVQRLLPVLCQAHG  
 LTPEQVVAIAS**NGGGKQ**ALETVQRLLPVLCQAHG  
 LTPQQVVAIAS**NGGGKQ**ALETVQALLPVLCQAHG  
 LTPEQVVAIAS**NGGGKQ**ALETVQALLPVLCQAHG  
 LTPEQVVAIAS**HDGGKQ**ALETVQRLLPVLCQAHG  
 LTPQQVVAIAS**NNGGKQ**ALETVQRLLPVLCQAHG  
 LTPQQVVAIAS**NGGGKQ**ALETVQRLLPVLCQAHG  
 LTPEQVVAIAS**NNGGKQ**ALETVQRLLPVLCQAHG  
 LTPEQVVAIAS**NGGGKQ**ALETVQRLLPVLCQAHG  
 LTPEQVVAIAS**NGGGKQ**ALETVQRLLPVLCQAHG  
 LTPEQVVAIAS**NGGGKQ**ALETVQRLLPVLCQAHG  
 LTPQQVVAIAS**HDGGKQ**ALETVQRLLPVLCQAHG  
 LTPEQVVAIAS**NNGGKQ**ALETVQRLLPVLCQAHG  
 LTPQQVVAIAS**NNGGKQ**ALETVQAXXPVLCQAHG  
 LTPQQVVAIAS**NI**GGRPALE

(f) *IL2RG*-specific TALEN, right subunit (repeat domains only)

LTPQQVVAIAS**NNGGKQ**ALETVQRLLPVLCQAHG  
 LTPEQVVAIAS**HDGGKQ**ALETVQRLLPVLCQAHG  
 LTPEQVVAIAS**NGGGKQ**ALETVQRLLPVLCQAHG  
 LTPEQVVAIAS**NNGGKQ**ALETVQRLLPVLCQAHG  
 LTPEQVVAIAS**NI**GGKQALETVQRLLPVLCQAHG  
 LTPEQVVAIAS**NNGGKQ**ALETVQRLLPVLCQAHG  
 LTPQQVVAIAS**HDGGKQ**ALETVQALLPVLCQAHG  
 LTPEQVVAIAS**NI**GGKQALETVQALLPVLCQAHG  
 LTPEQVVAIAS**HDGGKQ**ALETVQRLLPVLCQAHG  
 LTPQQVVAIAS**NGGGKQ**ALETVQRLLPVLCQAHG  
 LTPQQVVAIAS**NGGGKQ**ALETVQRLLPVLCQAHG  
 LTPEQVVAIAS**HDGGKQ**ALETVQRLLPVLCQAHG  
 LTPEQVVAIAS**HDGGKQ**ALETVQRLLPVLCQAHG  
 LTPEQVVAIAS**NI**GGKQALETVQRLLPVLCQAHG  
 LTPQQVVAIAS**HDGGKQ**ALETVQRLLPVLCQAHG  
 LTPEQVVAIAS**NI**GGKQALETVQRLLPVLCQAHG  
 LTPQQVVAIAS**NNGGKQ**ALETVQALLPVLCQAHG  
 LTPQQVVAIAS**NI**GGRPALE

**Supplementary Figure S1.** Amino acid sequences of TALE proteins used in this study. All TALEN are based on the AvrBs4 scaffold. (a) Sequence of AvrBs4 isolated from *Xanthomonas*. The N-terminal, central repeat domains, and C-terminal sequences are shown. Numbers preceded by a “+” indicate the positions of truncation variants relative to the DNA binding domain, while numbers preceded by a “Δ” indicate the deleted residues (compare to Fig. 1a). Repeat-variable di-residues (RVDs) are highlighted in bold. (b) Sequence of repeat domains of the natural *Xanthomonas* AvrBs3 protein. (c-f) Sequences of repeat domains of the engineered TALEs, used to target either the human *CCR5* locus (c, d) or human *IL2RG* locus (e, f).

## Supplementary Figure S2

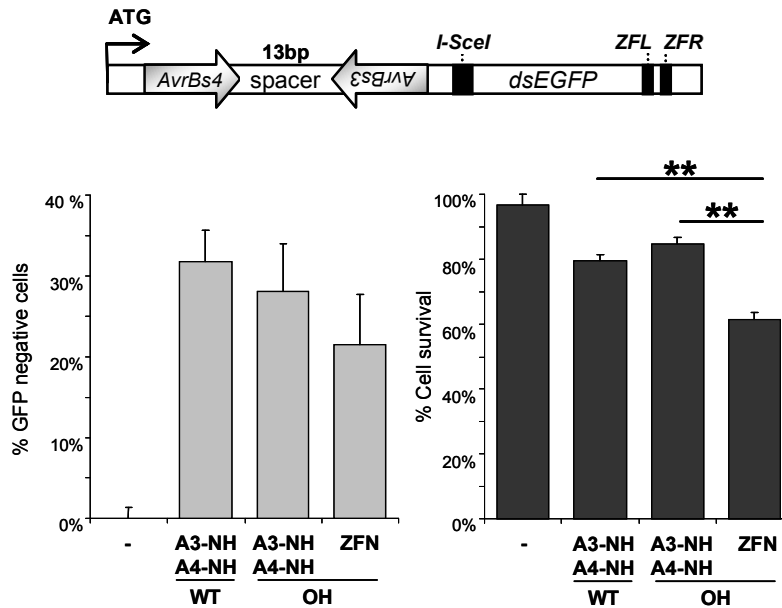

**Supplementary Figure S2.** Impact of the *FokI* cleavage domain on TALEN activity. HEK293 cells harboring an integrated *dsEGFP* gene that contains a heterodimeric TALEN recognition site separated by 13-bp spacer were transfected with expression vectors encoding TALEN pairs with either wild-type (WT) or obligate heterodimeric (OH) *FokI* variants, or a ZFN pair with OH. The graphs display the percentage of EGFP-negative cells 5 days after transfection (left panel) and relative cell survival as compared to cells expressing a nonfunctional nuclease (indicated by “-”; right panel). Statistically significant differences are indicated by \*\* ( $P < 0.01$ ).

## Supplementary Table S1

| Target               | Sequence (5' to 3') §                                               | Spacer (bp) |
|----------------------|---------------------------------------------------------------------|-------------|
| EBE_AvrBs4           | TATAATTAATAATCCACTT                                                 |             |
| EBE_AvrBs3           | TCTATAAACCTAACCCTCT                                                 |             |
| EBE_AvrBs4-6-AvrBs4  | TATAATTAATAATCCACTTgtcagtAAGTGGATTATTAATTATA                        | 6           |
| EBE_AvrBs4-8-AvrBs4  | TATAATTAATAATCCACTTaagaattcAAGTGGATTATTAATTATA                      | 8           |
| EBE_AvrBs4-9-AvrBs4  | TATAATTAATAATCCACTTgaattctttaAAGTGGATTATTAATTATA                    | 9           |
| EBE_AvrBs4-10-AvrBs4 | TATAATTAATAATCCACTTgaattctttaAAGTGGATTATTAATTATA                    | 10          |
| EBE_AvrBs4-12-AvrBs4 | TATAATTAATAATCCACTTaagaattctttaAAGTGGATTATTAATTATA                  | 12          |
| EBE_AvrBs4-15-AvrBs4 | TATAATTAATAATCCACTTtagtactgaattctttaAAGTGGATTATTAATTATA             | 15          |
| EBE_AvrBs4-16-AvrBs4 | TATAATTAATAATCCACTTtagtactgaattctttaAAGTGGATTATTAATTATA             | 16          |
| EBE_AvrBs4-18-AvrBs4 | TATAATTAATAATCCACTTtagtgacactgaattctttaAAGTGGATTATTAATTATA          | 18          |
| EBE_AvrBs4-21-AvrBs4 | TATAATTAATAATCCACTTtagtgacactgaattcgcttttaAAGTGGATTATTAATTATA       | 21          |
| EBE_AvrBs4-27-AvrBs4 | TATAATTAATAATCCACTTtagtgacactgaattcacagtagcatttaAAGTGGATTATTAATTATA | 27          |
| EBE_AvrBs4-13-AvrBs3 | TATAATTAATAATCCACTTtaggctcgagttacAGAGGGTTAGGTTATAGA                 | 13          |
| EBE_hCCR5            | TGTGGCAACATGCTGGTCatcctcatcctgataAACTGC AAAAGGCTGAAGA               | 15          |
| EBE_hCCR2            | TGTGGCAACATGCTGGTCgtcctcatcttaataAACTGC AAAAGGCTGAAGT               | 15          |
| EBE_hIL2RG           | TACACGTTTCGTGTTCGGAgccgctttaaccacTCTGTGGAAGTGCTCAGCA                | 15          |

§ Small letters represent the spacers

## Supplementary Table S2

| <b>Number</b> | <b>Sequence (5' to 3')</b> | <b>Target</b>            |
|---------------|----------------------------|--------------------------|
| #78           | tgcaccgctggataacgacat      | <i>in vitro</i> cleavage |
| #77           | aaqtcqtqctqcttcatqtqqt     | <i>in vitro</i> cleavage |
| #13           | tcacggggatttccaagtctc      | dsGFP-F                  |
| #559          | ctcggcgcggggtctttag        | dsGFP-R                  |
| #985          | aagatggattatcaagtgtcaagtcc | hCCR5-F                  |
| #986          | caaagtcccactgggcg          | hCCR5-R                  |
| #1093         | tcagtgaagggagcagtgtg       | hIL2RG-F                 |
| #1094         | aacaacacgctaaccaacc        | hIL2RG-R                 |
| #1474         | ggcaaagactgggaagttgc       | hCCR2-F                  |
| #1475         | gggacagaagcaaacacagc       | hCCR2-R                  |

Nucleotide sequences of primers used for genotyping.
